# Supplementary material
Source: Springer Nature journal article supplement (https://www.springermedizin.de/resource/supplementary/12873_2014_204_MOESM3_ESM.pdf/9431644)
Supplement: MOESM3 [file 9431644]

# EMERGENCY DEPARTMENT ROUTINE SCREENING FOR PSYCHOSOCIAL RISKS

## SCREENED POSITIVE FOR IPV RISK AND ALCOHOL ABUSE

### ELIGIBLE FOR TRIAL

- Female
- English speaking
- Age 18-64
- ED patient
- Positive for Current IPV (victim or perpetration) (CTS2S>1 in last 3 months)
- Heavy drinking (4 or more/day + AUDIT>4)
- Able to participate cognitively

### INELIGIBLE FOR TRIAL

- Intoxication at interview
- Cognitive impairment or psychosis identified
- Serious medical illness/ injury
- Suicidal or homicidal ideation
- No identifiable residence or contact number
- No access to a phone
- Under arrest at ED visit time
- Previously enrolled in the study

### INFORMED CONSENT/RANDOMIZATION

#### BRIEF INTERVENTION GROUP (BIG)

#### ASSESSED CONTROL GROUP (ACG)

#### NO CONTACT CONTROL GROUP (NCCG)

PROVIDES USUAL CARE: BRIEF COUNSELING & REFERRALS TO LOCAL COMMUNITY-BASED IPV & ALCOHOL INTERVENTION PROGRAMS

Baseline measures : Women's Health Interview

- Brief MET Intervention
- Booster ~10 days
- IVR (12 wks)
- 3,6,&12 month follow-up interview

- IVR (12 wks)
- 3,6,&12 month follow-up interview

- 3 month follow-up interview only

### Outcome Measures

#### PRIMARY OUTCOMES:

- Alcohol : Days of heavy drinking (AUDIT/AUDIT-C)
- IPV: Number of IPV events (CTS2S)

#### SECONDARY OUTCOMES:

- IPV severity (CTS2S/Composite Abuse Scale)
- Alcohol quantity/frequency (AUDIT/Timeline Followback)
- Other Health Related assessments: Self-rated health, smoking, exercise sleep, and quality of life, and relationship satisfaction

#### A PRIORI MEDIATORS:

Personal changes, Use of Social/Community support, engagement in treatment

#### A PRIORI MODERATORS:

Baseline IPV Severity, alcohol dependence, illicit drug use, partner's drinking, depression, PTSD, history of sexual abuse/assault.
